# Integrating behaviour and ecology into global biodiversity conservation strategies

Joseph A. Tobias<sup>1</sup>, Alex L. Pigot<sup>2</sup>

<sup>1</sup>*Department of Life Sciences, Imperial College London, Silwood Park, Buckhurst Road, Ascot, Berkshire, SL5 7PY, UK.*

<sup>2</sup>*Centre for Biodiversity and Environment Research, Department of Genetics, Evolution and Environment, University College London, Gower Street, London, WC1E 6BT, UK.*

**Keywords:** behavioural ecology, birds, indicators, latent risk, macroecology, priority-setting

---

## Summary

Insights into animal behaviour play an increasingly central role in species-focused conservation practice. However, progress towards incorporating behaviour into regional or global conservation strategies has been far more limited, not least because standardised datasets of behavioural traits are generally lacking at wider taxonomic or spatial scales. Here we make use of the recent expansion of global datasets for birds to assess the prospects for including behavioural traits in systematic conservation priority-setting and monitoring programmes. Using IUCN Red List classification for >9500 bird species, we show that the incidence of threat can vary substantially across different behavioural syndromes, and that some types of behaviour—including particular foraging, mating and migration strategies—are significantly more threatened than others. When all factors are included in a combined model, behavioural traits have a weaker effect than well-established geographical and ecological factors, including range size, body mass and human population pressures. We also show that the association between behavior and extinction risk is partly driven by correlations with these underlying factors. Overall, these results suggest that a multi-species approach at the scale of communities, continents and ecosystems can be used to identify and monitor threatened behaviours, and to flag up cases of latent extinction risk, where threatened status may currently be underestimated. Our findings also highlight the importance of comprehensive standardized descriptive data for ecological and behavioural traits, and point the way forward to a deeper integration of behaviour into quantitative conservation assessments.

---

\*Author for correspondence ([j.tobias@imperial.ac.uk](mailto:j.tobias@imperial.ac.uk)).

†Present address: *Department of Life Sciences, Imperial College London, Silwood Park, Buckhurst Road, Ascot, Berkshire, SL5 7PY, UK*

## 34 1. Introduction

35

36 Conservation biologists and behavioural ecologists have repeatedly called for closer links between their  
37 respective fields on the grounds that behavioural insights can contribute significantly to the success of  
38 conservation action (Clemmons & Buchholz 1997; Caro 1999; Caro & Sherman 2011; Greggor et al. 2016).  
39 However, this cross-disciplinary integration has progressed slowly, in part because the methods and central  
40 questions of behavioural ecology do not align closely with the needs of conservation practitioners (Greggor et  
41 al. 2016). For example, much of behavioural ecology focuses at the level of the individual, and identifies  
42 selective mechanisms acting on genes or organisms, whereas conservation typically operates at the level of  
43 populations (Caro 2007). This misalignment is perhaps most pronounced at macroecological scales where  
44 global analyses are playing a vital role in conservation science and policy (e.g. Newbold et al. 2015) but  
45 generally include only the most basic behavioural information.

46 One reason for the low profile of behaviour in comprehensive broad-scale analyses is because it is  
47 difficult and costly to measure standardised behavioural traits across species, space and time (Anthony &  
48 Blumstein 2000). The major contributions of behavioural research to conservation have dealt with factors such  
49 as individual movements, sensory ecology or animal personality, and the extent to which they mediate  
50 various kinds of human pressures, including disturbance, habitat loss and hunting (Greggor et al. 2016). The  
51 key behavioural metrics under this framework are context-dependent, highly plastic both within and between  
52 individuals, and typically estimated through detailed observation and experimentation. They are often  
53 inappropriate for quantitative assessments at the wider level of communities or ecosystems because they are  
54 (1) only available for a small fraction of species, and (2) not readily incorporated into species-level analyses.  
55 For instance, the case-dependent intricacies of how behaviour influences Effective population size ( $N$ ) are  
56 useful to conservation (Anthony & Blumstein 2000) but we are decades away from having these data available  
57 for comprehensive global studies.

58 Global or regional conservation assessments are largely restricted to comprehensive species-level  
59 datasets accessible at the relevant scale (see figure 1). Most macroecological analyses have therefore tested  
60 whether species conservation status is predicted by human impacts, biogeographical factors such as latitude  
61 or range size, and environmental factors such as climate or habitat (Bennett & Owens 1997, Owens & Bennett  
62 2000, Cardillo et al. 2004, Cardillo et al. 2005, Lee & Jetz 2011, Keinath et al. 2017), or reversed the process to  
63 predict the conservation status of poorly known species (Jetz & Freckleton 2015, Santini et al. 2019). Using  
64 freely available GIS layers, these socio-economic, biogeographical and environmental variables can be  
65 extracted for specimen localities or geographical range polygons, which in some vertebrate groups are  
66 reasonably accurate. The other main components of macro-scale assessments have been demographic factors,  
67 including population size and density, and rates of population decline, all of which are theoretically related to  
68 extinction risk (Keinath et al. 2017; Santini et al. 2019). In general, only crude population estimates are  
69 included in global-scale analyses because very few attempts have been made to quantify population sizes and  
70 trends across entire global ranges (Tobias & Seddon 2002, Tobias & Brightsmith 2007). Previous studies have  
71 shown that both extrinsic biogeographic and demographic factors are correlated with extinction risk, leading  
72 to their widespread inclusion in regional and international conservation status assessments.

73 Perhaps the most influential global assessment is the IUCN Red List (IUCN 2001), an indicator of  
74 biodiversity status and change linked to international convention targets (Butchart et al. 2005). The  
75 conservation status categories systematically generated by the Red Listing process are enshrined in legislation  
76 and widely used in macroecological research (Rodrigues et al. 2006). Previous assessments of predictors of

77 Red List status have generally focused on standard biogeographic or climatic variables, without delving far  
78 into behavioural or ecological factors. Indeed, the only ecological and behavioural traits incorporated into  
79 most global models of conservation risk are body mass, diet and habitat preferences (Lee & Jetz 2011;  
80 Newbold et al. 2015, Keinath et al. 2017). To convert these variables into species-level traits, body mass is  
81 typically averaged from small numbers of published estimates, while diet and habitat are classified into broad  
82 categories on the basis of published descriptions in secondary literature (Wilman et al. 2014). By contrast, the  
83 availability of many other behavioural or ecological variables is highly patchy at global scales, and limited by  
84 the difficulty of converting into species-level traits (figure 1).

85 The most relevant behavioural traits to conservation assessment include those that mediate sensitivity  
86 to habitat loss, fragmentation, and climate change (Greggor et al. 2016). Factors relating to dispersal behaviour  
87 are particularly pertinent because they impinge on the ability of species to cross unsuitable habitat and thus  
88 maintain interconnected metapopulations after habitat fragmentation (Lees & Peres 2009). Dispersal-related  
89 traits may also regulate the ability of species to track shifting geographical ranges in response to climate  
90 change (Early & Sax 2011, Howard et al. 2018), and predict susceptibility to threats like wind farms (Thaxter et  
91 al. 2017). In addition, behavioural dimensions of species interactions may be important determinants of  
92 responses to a variety of threats. For example, studies focused at the level of species pairs or communities find  
93 evidence that interspecific competition leads to population declines or local extinction following habitat loss  
94 and fragmentation (Bregman et al. 2015, Grether et al. 2017) while reproductive interference may threaten  
95 populations of closely related species interacting or hybridising when climate-driven range shifts lead to  
96 secondary contact (Hochkirch et al. 2007, Greggor et al. 2016). However, while standardised estimates of  
97 dispersal ability and interspecific competition are available for restricted samples of species, they are not  
98 readily available at macroecological scales, except in the form of extremely coarse categories (e.g. whether an  
99 organism can fly or not; Keinath et al. 2017).

100 Other variables potentially relevant to conservation status can be placed on a continuum from  
101 primarily ecological to primarily behavioural (figure 1). At the ecological end are aspects such as microhabitat  
102 preferences, while other factors such as foraging mode, migration, sexual selection, territoriality, reproductive  
103 strategy and nesting behaviour have an increasingly behavioural dimension. Previous research suggests that  
104 species sensitivity to land-use or climate change can be related to microhabitat (e.g. in the form of vertical  
105 stratum of vegetation), foraging behaviour (e.g. gregarious foraging), and reproductive strategy (e.g. breeding  
106 system) (Kokko & Brooks 2003, Bueno et al. 2018). Similarly, territorial strategy is linked to species sensitivity  
107 to habitat fragmentation (Ulrich et al. 2017), suggesting that elevated interspecific competition via behavioural  
108 mechanisms can increase threats associated with land-use and climate change (Jankowski et al. 2011, Grether  
109 et al. 2017). Until recently, such inferences were based on relatively restricted species sampling, but this  
110 constraint is changing as the compilation and dissemination of global trait datasets gathers pace.

111 To assess whether recent progress in data availability can pave the way for behavioral perspectives to  
112 be explicitly included in global conservation strategies, we compiled information on a variety of ecological  
113 and behavioural traits for all bird species, including estimates of sexual selection (Dale et al. 2015; Cooney et  
114 al. 2017), breeding system (Jetz & Rubenstein 2011), foraging strategy (Pigot et al. 2016, Felice et al. 2019),  
115 territorial behaviour (Tobias et al. 2016), and nest placement (Stoddard et al. 2017). We then ran multivariate  
116 models to evaluate the extent to which behaviour predicts IUCN Red List status at macroecological scales and  
117 in relation to a range of standard biogeographical and environmental variables. Our goal is to assess the  
118 current landscape of behavioural data availability and the prospects for more nuanced conservation  
119 assessments and priority-setting.

120

## 121 2. Methods

122

### 123 (a) Data

124

125 We assembled data on species threat status from the 2016 Red List (IUCN 2016) along with a range of  
126 potential drivers of variation in status, including biogeographic, ecological and behavioural traits, as well as  
127 the exposure of each species to human impacts. Geographic range size is consistently identified as the  
128 strongest predictor of threat status (Lee & Jetz 2011; Jetz & Freckleton 2015). We estimated range size for each  
129 species based on expert opinion extent of occurrence maps of species breeding distributions (BirdLife  
130 International, 2012). Human population pressure is also known to influence extinction risk (Cardillo et al.  
131 2004; Scharlemann et al. 2005; Davies et al. 2006). To quantify the exposure of species to human impacts, we  
132 first extracted polygon range maps onto an equal area grid (resolution of 110 km  $\approx$  1° at the equator) and used  
133 this grid to sample human population density, human appropriation of net primary productivity and night-  
134 time light intensity, an indicator of urbanisation and development. We calculated the mean value of each  
135 metric, averaged across all grid cells overlapping with each species range.

136 We collated data on a selection of ecological traits, including mean species body mass (g), habitat type,  
137 diet and island dwelling, all of which have been linked to extinction risk (Bennett & Owens 1997; Owens &  
138 Bennett 2000; Cardillo et al. 2005; Lee & Jetz 2011; Jetz & Freckleton 2015). We assigned species to one of ten  
139 dietary categories: aquatic animals, aquatic plants, terrestrial invertebrates, terrestrial vertebrates, terrestrial  
140 carrion, nectar, seeds, fruit, other terrestrial plant matter (e.g. leaves) and omnivore, based on the dominant  
141 resource present in their diet (see Supplementary material). Data on proportional resource use were first  
142 obtained from Wilman et al. (2014), and then modified and updated based on comprehensive literature  
143 searches. Our dietary classification differs from Wilman et al. (2014) in that we subdivided each animal or  
144 plant-based resource type into separate aquatic and terrestrial categories (see Felice et al. 2019). This helps us  
145 to avoid highly heterogeneous categories such as invertivores, which spans a wide variety of species from  
146 insectivorous warblers to squid-eating albatrosses and crustacean-eating flamingos (Wilman et al. 2014). Our  
147 approach separates warblers (diet: "terrestrial invertebrates") into a different category from albatrosses and  
148 flamingos (diet: "aquatic animals"). Using literature to score habitat use, we assigned species to broad habitat  
149 categories (coastal, terrestrial, freshwater, sea) according to the predominant habitat utilised across their  
150 geographic distribution. We included habitat type as a predictor in our main models but also used this  
151 variable along with a measure of forest dependency (obtained from BirdLife International:  
152 <http://datazone.birdlife.org/home>) to subset our data and perform additional analysis focusing on terrestrial  
153 species (n = 8433) or those with medium to high forest dependency (n = 5646). Using the geographical range  
154 polygons described above, we classified species as island dwelling if more than 25% of their geographic range  
155 occurred on small islands (landmass <2000 km<sup>2</sup>). Further details of data compilation methods are given in  
156 supplementary materials.

157 To assess the association between IUCN threat status and key behavioural traits, we assembled data  
158 on foraging strategy, nest placement, breeding system, mating behaviour, the mean clutch size of broods,  
159 territoriality and migratory behaviour. Following the method described by Felice et al. (2019), we used  
160 literature searches to assign species to one of seven foraging strategies. We classified each species according to  
161 the predominant behavioural strategy used to acquire resources, and assigned species utilising multiple  
162 foraging strategies as generalists (see Supplementary material). Nest placement was scored into a simple

163 three-way system: ground, elevated or cavity (see Stoddard et al. 2017 for details). We used a binary score of  
164 breeding system based on a published classification of cooperative and noncooperative breeders (Jetz &  
165 Rubenstein 2011). Mating behaviour was scored as strict monogamy, monogamy with infrequent (<5% males)  
166 polygyny, monogamy with frequent (5-20% males) polygyny, and polygamy (>20% males and females). These  
167 categories are based on the index of sexual selection developed by Dale et al. (2015). Clutch size data was  
168 based on Jetz et al. (2008). Using data from Tobias et al. (2016), we assigned all species to three categories  
169 according to the degree of territoriality: 'strong' (territories maintained throughout year), 'weak' (weak or  
170 seasonal territoriality, including species with broadly overlapping home ranges or habitually joining mixed  
171 species flocks), and 'none' (never territorial or at most defending very small areas around nest sites). Finally,  
172 we assigned the migratory behaviour of species as either sedentary, partially migratory (minority of  
173 population migrates long distance or most individuals migrate short distances) and migratory (majority of  
174 population undertakes long-distance migration) (Tobias et al. 2016).

175 Most variables were available for the vast majority (i.e.>99%) of species but the identity of species  
176 with missing values differed across variables. For categorical predictors, we imputed missing values using the  
177 modal class for each genus, if the genus contained at least 2 species and the modal class was present across at  
178 least 75% of species. If these conditions were not met, we used the same criteria to either impute missing  
179 values at the family level. After removing all species with any missing values, our final dataset included  $n =$   
180 9576 species.

181

## 182 (b) Statistical analysis

183

184 To model the effects of each predictor variable on extinction risk, we treated threat as a binary variable (0, 1)  
185 according to the IUCN Red List categories. All species listed as Vulnerable, Endangered, Critically  
186 Endangered, Extinct (including Extinct in the Wild) were classified as Threatened; the remainder (Near  
187 Threatened, Least Concern and Data Deficient) were classified as non-Threatened. We modelled threat using a  
188 generalised linear mixed effects model, with a binomial error structure and including taxonomic family as a  
189 random effect to control for the phylogenetic non-independence of species when identifying predictors of  
190 threat. Predictor variables exhibiting right skew were log transformed prior to analysis.

191 In contrast to previous assessments of the predictors of extinction risk in birds (e.g. Lee & Jetz 2011),  
192 we are particularly interested in how behaviour and its covariation with other putative drivers of extinction  
193 risk alter the incidence of threat. First, to assess the overall association between each predictor and threat, we  
194 fitted a series of single predictor (i.e. univariate) models. Second, we generated a series of multivariate models  
195 and calculated relative model fit according the Akaike Information Criterion (AIC). We assessed the relative  
196 importance of each behavioural trait relative to other predictors by excluding each variable in turn from the  
197 full model and calculating the difference in AIC (delta AIC). We then assessed the overall contribution of  
198 behavioural traits in predicting threat by calculating the AIC and  $r^2$  of a full model including all predictor  
199 variables, and comparing with a model excluding behavioural traits. Finally, we also calculated the AIC and  $r^2$   
200 of a model including only behavioural traits.

201 When comparing univariate and multivariate models, we were particularly interested in testing how  
202 covariation between behavioural traits and ecological, geographical or socio-economic variables may modify  
203 the association between threat and behaviour. We identify three possible scenarios. First, when behaviour is  
204 weakly related to threat, we may nevertheless find strong variation in the incidence of threat across  
205 behavioural categories because of differences in other factors that drive variation in threat (i.e. ecology,



206 geography or human impacts), an example of an ‘enhanced’ effect. Second, the opposite pattern may emerge,  
207 if behaviour has a significant effect on threat, but this effect is ‘masked’ by countervailing effects of ecological,  
208 geographical or human impacts. Finally, the apparent effect of a given behaviour on threat could even be  
209 ‘reversed’, when taking into account covariation with other factors.

210 To examine how the definition of threat may influence the predictors of extinction risk, we repeated  
211 our analysis considering only threatened species ( $n = 1216$ ), predicting lower (0 [Vulnerable]) or higher (1  
212 [Endangered, Critically Endangered, Extinct]) levels of threat. To assess how the predictors of threat may  
213 change across broad habitat types, we repeated our analysis on different subsets of our data including all  
214 species ( $n = 9576$ ), terrestrial species ( $n = 8433$ ) and forest dependent species ( $n = 5646$ ).

215

## 216 Results

217

218 Our results identified a number of core predictors of threat status that align closely with previous assessments  
219 indicating that threat arises as a combination of geography, ecology and human impacts (Fig. 2). Specifically,  
220 the strongest predictor of threat status is geographical range size, with additional strong effects of body mass,  
221 island dwelling and the mean human population density across the species geographic range, a metric of  
222 exposure to human impact. In both univariate and multivariate models, the incidence of threat decreases with  
223 geographic range size and increases with body size (Table S1). When tested in isolation, the incidence of threat  
224 is higher on islands than on the mainland and in areas of low human population density (Table S1). However,  
225 in the full multivariate model, these effects are reversed, with a higher incidence of threat in areas of greater  
226 human population density, but a lower incidence of threat on islands (Table S1, see also Manne et al 1999).  
227 In addition to these core predictors, we also identified an effect of behaviour on extinction risk. A multivariate  
228 model including behavioural traits alone explains 7% of the variance in threat status. A full multivariate  
229 model including all predictors is significantly better supported than one excluding behavioural traits (delta  
230 AIC = 36) although the improvement in explanatory power is small ( $R^2$  excluding versus including behaviour  
231 = 0.49 versus 0.51 respectively). Behavioural traits receiving strong support for inclusion in the full  
232 multivariate model (delta AIC >2) were mating behaviour (monogamous or polygamous mating) and  
233 migration (Fig. 2). Behavioural traits receiving weak or no support for inclusion in the model (delta AIC <2)  
234 were foraging mode, breeding system, territoriality, nest placement and clutch size. The effects of behaviour  
235 were similar regardless of whether we conducted our analysis across all birds, only terrestrial species (Fig.  
236 S1a) or those restricted to forests (Fig. S1b). This is perhaps not surprising, given that forest dependent species  
237 comprise more than half of all birds. We note, however, that the role of behaviour in predicting threat does  
238 depend on the way in which threat is defined. Specifically, while behaviour is a significant predictor of  
239 whether a species is threatened or not (delta AIC = 36), it does not predict the level of threat (i.e. whether a  
240 species is Vulnerable versus Endangered, Critically endangered or Extinct) (delta AIC = -15, Fig. S2).

241 Some behavioural traits were unrelated to threat, regardless of whether they were considered in  
242 isolation or in the full multivariate model. In particular, we found no effect of nest placement or breeding  
243 system in our models (Fig. 3, Table S1). In other cases, threat exhibited significant associations with behaviour,  
244 but with effects that varied depending on whether we accounted for other putative drivers of extinction risk  
245 (Fig. 3a, Table S1). In the case of foraging behaviour, we find that the incidence of threat varies substantially  
246 across foraging categories. For instance, >30% species that feed either by diving or by aerial attacks in aquatic  
247 habitats are threatened compared to <10% species that are foraging generalists or bark probing specialists in  
248 terrestrial habitats (Fig. 3a). However, our full multivariate model shows that most of this variation in the

249 incidence of threat is driven by covariation between foraging behaviours, ecological traits and exposure to  
250 human impacts (Fig. 4). In particular, species feeding at sea and with large body size are more threatened than  
251 land-based and small bodied species (Fig. S3). Having accounted for these confounding variables, only species  
252 feeding by aerial attacks in aquatic habitats have significantly higher levels of threat (i.e. an example of an  
253 'enhanced' effect) (Fig. 4, Table S1). A similar effect was also found for clutch size (Table S1). While the  
254 incidence of threat declines with increasing clutch size, this association is not significantly supported when  
255 accounting for confounding variables in the full multivariate model (Table S1).

256 Mating behaviour provides a possible example of a 'masking' effect. When tested in isolation, we  
257 found that polygamous species are no more likely to be threatened than monogamous species (Fig. 3b, Table  
258 S1). However, after accounting for the confounding effects of other predictors in the full multivariate model,  
259 we found that the probability of being threatened is significantly higher among polygamous than  
260 monogamous species (Fig. 4, Table S1). This effect of mating behaviour is masked when considered in  
261 isolation because polygamous species on average have a smaller body size than monogamous species, and this  
262 smaller body size nullifies the effect of mating behaviour on threat (Fig. S3). This suggests that polygamy may  
263 enhance the risk of extinction but that its effects may have been masked due to covariation with other factors  
264 that decrease extinction risk.

265 In a univariate model, we found that proportionately fewer migrants are threatened compared to  
266 partial migrants or sedentary species (Fig. 3c, Table S1). This may suggest that migration, or perhaps  
267 associated greater vagility, buffers species from extinction. However, in our full model we found the opposite  
268 effect of migration on the likelihood of being threatened, whereby migrants are more likely to be threatened  
269 than sedentary species (Fig. 4). These contrasting findings arise because migratory tendency is strongly  
270 correlated with range size, with migrants have larger breeding ranges on average than sedentary species (Fig.  
271 S3), and thus a lower incidence of threat. However, having statistically accounted for the negative effects of  
272 range size on threat, migrants are more likely to be threatened than sedentary species (Fig. 4, Table S1). This  
273 suggests that undertaking long distance migration makes species more at risk of extinction but that this is  
274 unable to overcome the effects of other covarying factors that instead lead to a higher prevalence of threat  
275 among sedentary species (i.e. an example of a 'reversed' effect).

## 276 277 **Discussion**

278  
279 We have shown that global-scale ecological and behavioural datasets predict variation in IUCN Red List  
280 status of birds, but that these relationships are largely explained by underlying correlations with well-  
281 established macroecological variables. Some behavioural traits were only significant predictors when  
282 behaviour was analysed independently, becoming non-significant when correlations with factors such as body  
283 size, geographical range size and human impacts were included. Conversely, other behavioural traits were not  
284 significant predictors in behaviour-only models, and their effect was only evident when socio-economic and  
285 biogeographic variables were included. These findings are consistent with previous reports that most  
286 ecological and behavioural traits have relatively weak associations with conservation status when  
287 incorporated into regional or global models as a species-level trait (Lee and Jetz 2011, Newbold et al. 2015,  
288 Keinath et al. 2017). However, although we find little evidence that the recent expansion of behavioural  
289 datasets can contribute substantially to refining conservation strategies at these wider scales, our results also  
290 show that behavioural traits act as modifiers that can improve explanatory power in conservation assessments  
291 and other predictive exercises.

292 The traits with strongest influence on conservation status were foraging strategy, mating behaviour  
293 and migration. Even in these cases, we found that significant relationships between behaviour and  
294 conservation status were only detected for certain strategies. For example, bird species foraging by diving  
295 from air to water were significantly more threatened than otherwise predicted. Moreover, a number of  
296 species-level behaviours, including variation in breeding system, territoriality, and nest placement, had little  
297 predictive power in explaining variation in IUCN Red List status regardless of how they were entered into  
298 models. This does not necessarily indicate that such factors are unimportant to conservation, as it is well  
299 known that they play a role in some contexts (e.g. nest design and placement has important implications for  
300 predation risk in modified landscapes; Wilcove 1985). However, our models show that these effects are minor  
301 and often overwhelmed by other non-behavioural factors at global scales.

302 These results do not support the integration of behaviour into global conservation assessment  
303 frameworks, including the IUCN Red List criteria. However, the accuracy of Red List assessments might be  
304 improved by using life history and behaviour to scale terms in the criteria which are difficult to assess or  
305 define, such as “number of mature individuals” and “future rate of decline” (IUCN 2001). These factors are  
306 typically judged with a large dose of guesswork (see Tobias & Seddon 2002, Tobias & Brightsmith 2007).  
307 Guidelines on how to scale judgements in relation to ecological and behavioural factors such as mating  
308 systems, sex ratios, reproductive rate and predation pressure could be useful in fine-tuning predictions of  
309 “number of mature individuals” and “future rate of decline”. Moreover, for Red List assessors considering  
310 what constitutes “severe fragmentation”, future versions of the criteria may be improved with guidelines on  
311 how best to account for dispersal ability, gap-crossing ability and ecological specialism.

312  
313 (a) Challenges

314  
315 Our findings highlight one of the key challenges of applying behavioural data over larger spatial and  
316 taxonomic scales, namely that behavioural traits can have a major influence in particular species or contexts,  
317 yet only reduced effect in global analyses. This occurs for two main reasons. First, behavioural traits are  
318 inherently flexible within and between individuals and therefore poorly represented by averaging across  
319 entire species or populations. Second, behaviour is often not consistently or independently associated with  
320 extinction risk in the same way as, for example, low population size, small geographic range and slow  
321 reproductive output (Cardillo 2005, Lee and Jetz 2011).

322 This point can be illustrated by year-round territoriality, a system of resource defence most  
323 widespread in tropical birds (Tobias et al. 2016). Intense year-round territorial behaviour can increase the risk  
324 of extinction in some contexts, such as mountaintop species driven to extinction through costly agonistic  
325 interactions with lower elevation replacements moving upslope in response to climatic warming (Jankowski et  
326 al. 2011, Freeman et al. 2018). The costs of territoriality are asymmetric, producing both lower-elevation  
327 winners and upper-elevation losers. Moreover, the pattern of non-overlapping elevational ranges for highly  
328 territorial species holds largely true for some species pairs and localities (Freeman et al. 2019), but not others  
329 (Boyce & Martin 2019), particularly in lowland systems where species do not tend to occupy rare climatic  
330 niches or to share parapatric range boundaries with close ecological competitors. Given that the relationship  
331 between territoriality and extinction risk is bidirectional and context-dependent, it makes sense that we find  
332 no overall link between territoriality and IUCN Red List status.

333 An important viewpoint to bear in mind is that the models presented here treat behaviour as an  
334 independent species-level trait whereas the influence of behaviour is often dependent on inter-relationships



335 among species. Staying with the example of territoriality, the key factor is not so much whether a particular  
336 species aggressively defends territories year-round, but whether it directly competes with a closely related  
337 taxon that does the same. Thus, future versions of global models or associated conservation assessments  
338 should consider scoring behavioural interactions rather than behaviour per se. Advancing towards this goal is  
339 particularly urgent given that species interactions are sensitive to environmental effects. Both climate and  
340 land-use change can potentially influence the behavior of multiple interacting species, as well as their  
341 phenology, physiology and relative abundance, and we ideally need to quantify a range of behavioural  
342 interactions and responses to understand how environmental changes affect interaction-based ecosystems  
343 (Tylianakis et al., 2008). Again, the key challenge is that the role of behavior in heterotrophic systems can be  
344 complex and highly flexible (Ness & Bressmer 2005), creating difficulties for multi-species models.  
345 Nonetheless, we may improve predictions by incorporating behaviour in more sophisticated ways using  
346 interaction-based models, starting at local scales and expanding to larger scale ecological networks when data  
347 become available.

348 A related point is that, although we have largely focused on how particular behaviours may influence  
349 extinction risk, such factors may yet prove to be less important than behavioural flexibility itself (Sol et al.  
350 2016). Individual organisms with the ability to modify their behaviour through adaptability (i.e. plasticity)  
351 may be better able to survive when confronted with novel environmental conditions and selection pressures  
352 imposed by anthropogenic change. Defining and developing general indices of behavioural flexibility and  
353 innovation remains a challenge (Audet & Lefebvre 2017), but may nevertheless be broadly predictable by  
354 morphometric traits that are increasingly available at large scales (Sol et al. 2005). For instance, differences in  
355 relative brain size across species is positively associated with rates of behavioural innovation in birds, an effect  
356 that may explain the apparently greater success of large brained species in colonising and persisting in more  
357 unpredictable environments (Sayol et al. 2006, Sol et al. 2008), including cities, the most highly altered of  
358 human environments (i.e. the ‘cognitive buffer’ hypothesis) (Sol et al. 2013).

#### 359 360 (b) Opportunities

361  
362 Although they extend the number of behavioural traits compiled across a major global radiation, our analyses  
363 are limited by the patchy availability of trait datasets and thus remain highly incomplete (figure 1). A major  
364 omission is dispersal behaviour, which we only include as a simple score of migration. Dispersal has long  
365 been considered relevant to the conservation of fragmented populations and the optimum design of reserve  
366 networks (Caro 1999). However, despite the likely importance of dispersal to understanding biodiversity  
367 responses to habitat loss and fragmentation, most broad-scale models (e.g. Newbold et al. 2013, Bregman et al.  
368 2014) lack estimates of dispersal behaviour simply because they are generally not available as a standardised  
369 organismal trait at macroecological scales. This problem may be addressed by the fast-moving field of  
370 movement ecology, with GPS trackers and loggers deployed over increasing numbers of species (Kays et al.  
371 2015), and data compilation accelerated by new satellite tracking systems, such  
372 as ICARUS (<https://icarusinitiative.org>). Given that it could take decades for these technological innovations  
373 to generate comprehensive dispersal estimates across major taxonomic groups, one potential stopgap solution  
374 is to use morphometric indices of dispersal or flight ability. Dispersal indices, such as hand-wing index in  
375 birds, can be estimated by measuring museum specimens to provide a fuller picture of spatial ecology and  
376 movement behaviour across multiple species in macroecological analyses (e.g. Pigot & Tobias 2015) and  
377 comparative studies of anthropogenic threats (e.g. Thaxter et al. 2017). Such indices, along with further

378 missing data on factors such as reproductive rate and sensitivity to disturbance (figure 1) should be compiled  
379 and applied to conservation assessments at global scales.

380 Another area where behavioural indices may prove useful is ecological forecasting. At present,  
381 dispersal is usually ignored in global range shift models, or only included on the basis of extremely crude  
382 metrics, such as geographical range size (e.g. Hof *et al.* 2018). Similarly, species interactions are difficult to  
383 quantify and, while most range shift forecasting models acknowledge the limitation, they are generally not  
384 included in analyses. Future models should explore the possibility of estimating the strength of species  
385 interactions using either pairwise morphometric trait divergence or scores of territorial behaviour, both of  
386 which have been shown to limit geographical range overlap in pairs of avian sister species (Pigot & Tobias  
387 2013, Freeman *et al.* 2019). Theoretically, suites of behavioural traits and associated morphometric indices can  
388 be incorporated into species distribution modelling in much the same way proposed for detailed physiological  
389 traits (Chown 2012).

390 The associations we detect between behaviour and conservation status (figure 3) suggests that future  
391 research could use similar techniques to identify “threatened behaviours” or suites of behaviours. Using  
392 global analyses to look beyond species conservation and instead to identify behaviours that are rare or  
393 declining might be a useful step towards targeting conservation action towards maintaining behavioural trait  
394 diversity. Similarly, the completion of rich behavioural trait datasets for entire taxonomic groups would pave  
395 the way towards multi-dimensional community-based analyses of behavioural diversity (BD) metrics,  
396 adopting methods from the functional diversity (FD) literature (Petchey & Gaston 2002, Villéger *et al.* 2008).  
397 Setting strategic conservation priorities based on rare behaviours or BD may have important implications for  
398 ecosystem function, particularly when focusing on behavioural traits linked to key ecological processes, such  
399 as trophic interactions (pollination, seed dispersal, etc.). In addition, there are opportunities for including  
400 behaviours in models designed to pinpoint likely future shifts in conservation status by estimating latent  
401 extinction risk (Cardillo *et al.* 2006). The way these models work is to predict threat status for any taxon based  
402 on a wide range of attributes and then compare predictions with their observed threat status, thus flagging up  
403 any species currently ‘flying under the radar’ (i.e. likely more threatened, and thus a higher conservation  
404 priority, than indicated by their current conservation status).

#### 405 406 (c) Conclusions

407  
408 Over recent years, there have been repeated calls for behavioural ecologists to increase their focus on  
409 conservation, not least because their study organisms are being driven to extinction by anthropogenic change  
410 (Caro & Sherman 2011). Previous authors have suggested that bridging the gulf between these fields might be  
411 achieved by applying the experimental or mechanistic approaches predominant in behavioural ecology to  
412 conservation research (Linklater 2004), or else returning to more descriptive forms of behavioural ecology  
413 potentially relevant to conservation (Caro 2007). However, neither of these approaches are exactly suited to  
414 the needs of global conservation assessments which call for simple standardised classifications of basic  
415 behavioural traits at ambitious scales, including natural history observations and morphometric  
416 measurements. Our analyses show how broad-scale behavioural classifications are now within reach for some  
417 major taxa, highlighting the need for continued sampling of basic descriptive information for massive samples  
418 of species and pointing the way forward to a deeper integration of the resultant datasets into conservation  
419 assessments at the scale of clades, communities and ecosystems.

420

## 421 Additional Information

### 422 Data Accessibility

423 Most datasets used in the analyses are openly available in published sources cited in the methods. Where we  
424 have used primary data these are provided in the Supplementary Material.

425

### 426 Authors' Contributions

427 J.A.T and A.L.P developed the concepts and compiled data; A.L.P conducted analyses and produced figures;  
428 J.A.T wrote the manuscript with substantial input from A.L.P.

429

### 430 Competing Interests

431 We have no competing interests.

432

## 433 Acknowledgments

434

435 We are grateful to Jakob Bro-Jorgenson for inviting us to contribute to this special issue. We thank Stu  
436 Butchart for sharing insights into Red List processes, and numerous collaborators and assistants for help with  
437 compiling and organizing data, including Monte Neate-Clegg, Ruth Brandt. This research was funded by a  
438 Natural Environment Research Grant (NE/I028068/1 to JAT) and a Royal Society University Research  
439 Fellowship (to ALP).

440

## 441 References

442 Anthony LL, Blumstein DT. 2000. Integrating behaviour into wildlife conservation: The multiple ways that  
443 behaviour can reduce *N. Biol. Conserv.* **95**, 303–315.

444

445 Audet JN, Lefebvre L. 2017. What's flexible in behavioral flexibility? *Behavioral Ecology* **28**, 943–947,  
446 doi:10.1093/beheco/arx007

447

448 Barton K. 2018. MuMIn: Multi-Model Inference. R package version 1.42.1. [https://CRAN.R-](https://CRAN.R-project.org/package=MuMIn)  
449 [project.org/package=MuMIn](https://CRAN.R-project.org/package=MuMIn)

450

451 Bates D, Maechler M, Bolker B, Walker S. 2015. Fitting Linear Mixed-Effects Models Using lme4. *Journal of*  
452 *Statistical Software* **67**, 1–48. doi:10.18637/jss.v067.i01

453

454 Bennett PM, Owens IPF. 1997. Variation in extinction risk among birds: Chance or evolutionary  
455 predisposition? *Proc. R. Soc. B* **264**, 401–408, doi:10.1098/rspb.1997.0057

456

457 Berger-Tal O, Polak T, Oron A, Lubin Y, Kotler BP, Saltz D. 2011. Integrating animal behavior and conservation  
458 biology: a conceptual framework. *Behav. Ecol.* **22**, 236–239.

459

- 460 Berger-Tal O et al. 2015 A systematic survey of the integration of animal behavior into conservation. *Conserv.*  
461 *Biol.* **30**, 744–753.
- 462
- 463 Birdlife International, 2012. *Bird species distribution maps of the world. Version 2.0*. Cambridge,  
464 UK Arlington, Texas: BirdLife International/NatureServe.
- 465
- 466 Boyce AJ, Martin TE, 2019. Interspecific aggression among parapatric and sympatric songbirds on a tropical  
467 elevational gradient. *Behav. Ecol.* Online Early <https://doi.org/10.1093/beheco/ary194>
- 468
- 469 Bregman TP, Sekercioglu CH, Tobias JA. 2014 Global patterns and predictors of bird species responses to  
470 forest fragmentation: Implications for ecosystem function and conservation. *Biol. Conserv.* **169**: 372–383.
- 471
- 472 Bregman TP, Lees AC, Seddon N, MacGregor HEA, Darski B, Aleixo A, Bonsall MB, Tobias JA. 2015 Species  
473 interactions regulate the collapse of biodiversity and ecosystem function in tropical forest fragments. *Ecology*  
474 **96**, 2692–2704.
- 475
- 476 Bueno AS, Dantas SM, Henriques LMP, Peres CA. 2018. Ecological traits modulate bird species responses to  
477 forest fragmentation in an Amazonian anthropogenic archipelago. *Divers. Distrib.* **24**, 387–402.
- 478
- 479 Butchart SHM, Stattersfield AJ, Bennun LA, Akcakaya HR, Baillie JEM, Stuart SN, Hilton-Taylor C, Mace GM.  
480 2005 Using Red List indices to measure progress towards the 2010 target and beyond. *Phil. Trans. R. Soc. B*  
481 **1454**, 255–268.
- 482
- 483 Cardillo M, Purvis A, Sechrest W, Gittleman JL, Bielby J, Mace GM. 2004. Human population density and  
484 extinction risk in the world's carnivores. *PLoS Biol.* **2**, 909–914.
- 485
- 486 Cardillo M *et al.* 2005. Multiple causes of high extinction risk in large mammal species. *Science* **309**, 1239–1241,  
487 doi:10.1126/science.1116030
- 488
- 489 Cardillo M, Mace GM, Gittleman JL, Purvis A. 2006. Latent extinction risk and the future battlegrounds of  
490 mammal conservation. *Proc. Natl. Acad. Sci. USA* **103**, 4157–4161.
- 491
- 492 Caro T. 1999. The behavior-conservation interface. *Trends Ecol. Evol.* **14**, 366–369.
- 493
- 494 Caro T. 2007. Behavior and conservation: a bridge too far? *Trends Ecol. Evol.* **22**, 394–400.
- 495
- 496 Caro T, Sherman PW. 2011. Endangered species and a threatened discipline: Behavioural ecology. *Trends Ecol.*  
497 *Evol.* **26**, 111–118.
- 498
- 499 Chown SL. 2012. Trait-based approaches to conservation physiology: forecasting environmental change risks  
500 from the bottom up. *Phil. Trans. R. Soc. B* **367**, 1615–1627.
- 501

- 502 Clemmons JR, Buchholtz R. 1997. Behavioral Approaches to Conservation in the Wild. Cambridge University  
503 Press, Cambridge.  
504
- 505 Cooney CR, Tobias JA, Weir JT, Botero CA, Seddon N. 2017. Sexual selection, speciation, and constraints on  
506 geographical range overlap in birds. *Ecol. Lett.* **20**, 863–871.  
507
- 508 Dale J, Dey CJ, Delhey K, Kempnaers B, Valcu M. 2015. The effects of life history and sexual selection on male  
509 and female plumage colouration. *Nature* **527**, 367–370.  
510
- 511 Davies RG et al. 2006. Human impacts and the global distribution of extinction risk. *Proc. R. Soc. B* **273**, 2127–  
512 2133.  
513
- 514 Early R, Sax DF. 2011. Analysis of climate paths reveals potential limitations on species range shifts. *Ecol. Lett.*  
515 **14**, 1125–1133.  
516
- 517 Felice RN, Tobias JA, Pigot AL, Goswami A. 2019. Dietary niche and the evolution of cranial morphology in  
518 birds. *Proc. R. Soc. B* **286**, 20182677.  
519
- 520 Freeman BG, Scholer MN, Ruiz-Gutierrez V, Fitzpatrick JW. 2018. Climate change causes upslope shifts and  
521 mountaintop extirpations in a tropical bird community. *Proc Nat Acad Sci USA* **115**, 11982–11987  
522
- 523 Freeman BG, Tobias JA, Schluter D. 2019. Behavior influences range limits and patterns of coexistence across  
524 an elevational gradient in tropical bird diversity. *bioRxiv* **2019**, 528950.  
525
- 526 Greggor AL et al. 2015. Research priorities from animal behaviour for maximising conservation progress.  
527 *Trends Ecol. Evol.* **31**, 953–964.  
528
- 529 Grether GF, Peiman KS, Tobias JA, Robinson BW. (2017) Causes and consequences of behavioral interference  
530 between species. *Trends Ecol. Evol.* **32**, 760–772.  
531
- 532 Hochkirch A, Groning J, Bucker A. 2007. Sympatry with the devil: reproductive interference could hamper  
533 species coexistence. *J. Anim. Ecol.* **76**, 633–642.  
534
- 535 Hof C, Voskamp A, Biber MF, Böhning-Gaese C, Engelhardt EK, Niamira A, Willis SG, Hickler T. 2018.  
536 Bioenergy cropland expansion may offset positive effects of climate change mitigation for global vertebrate  
537 diversity. *Proc. Natl. Acad. Sci. USA* **115**, 13294–13299.  
538
- 539 Howard C, Stephens PA, Tobias JA, Sheard C, Butchart SHM, Willis SG, 2018. Flight range, fuel load, and the  
540 impact of climate change on the journeys of migrant birds. *Proc. R. Soc. B* **285**: 20172329.  
541
- 542 IUCN, 2001. IUCN Red List Categories and Criteria: Version 3.1. IUCN Species Survival Commission. IUCN,  
543 Gland, Switzerland and Cambridge, UK.  
544 <http://app.iucn.org/webfiles/doc/SSC/RedList/redlistcatsenglish.pdf>.



545  
546 IUCN 2016. The IUCN Red List of Threatened Species. Version 2016-2 <http://www.iucnredlist.org>.  
547 Downloaded on 15 July 2016) .  
548  
549 Jankowski JE, Robinson SK, Levey DJ, 2010. Squeezed at the top: Interspecific aggression may constrain  
550 elevational ranges in tropical birds. *Ecology* **91**, 1877–1884.  
551  
552 Jetz W, Freckleton RP, 2015. Towards a general framework for predicting threat status of data-deficient species  
553 from phylogenetic, spatial and environmental information. *Phil Trans R Soc B* **370**, 20140016.  
554  
555 Jetz W, Rubenstein DR (2011) Environmental uncertainty and the global biogeography of cooperative  
556 breeding in birds. *Curr. Biol.* **21**, 1–7.  
557  
558 Jetz W, Sekercioglu CH, Bohning-Gaese K, 2008. The worldwide variation in avian clutch size across species  
559 and space. *PLoS Biol.* **6**, 2650–2657.  
560  
561 Kays R, Crofoot MC, Jetz W, Wikelski M. 2015. Terrestrial animal tracking as an eye on life and planet. *Science*  
562 **348**, aaa2478.  
563  
564 Keinath DA et al. 2017. A global analysis of traits predicting species sensitivity to habitat fragmentation. *Glob.*  
565 *Ecol. Biogeog.* **26**, 115–127.  
566  
567 Kokko H, Brooks R, 2003. Sexy to die for? Sexual selection and the risk of extinction. *Ann. Zool. Fennici* **40**,  
568 207–219.  
569  
570 Lee T. & Jetz, W. 2011 Unravelling the structure of species extinction risk for predictive conservation science.  
571 *Proc. R. Soc. B* **278**, 1329–1338.  
572  
573 Lees AC, Peres CA, 2009. Gap-crossing movements predict species occupancy in Amazonian forest fragments.  
574 *Oikos* **118**, 280–290.  
575  
576 Linklater WL, 2004. Wanted for conservation research: Behavioral ecologists with a broader perspective.  
577 *Bioscience* **54**: 352–360.  
578  
579 Manne L, Brooks TM, Pimm SL. 1999. Relative risk of extinction of passerine birds on continents and islands.  
580 *Nature* **399**, 258–261.  
581  
582 Nakagawa S, Schielzeth HA, 2013. A general and simple method for obtaining R<sup>2</sup> from generalized linear  
583 mixed-effects models. *Methods Ecol Evol* **4**, 133–142, doi:10.1111/j.2041-210x.2012.00261.x.  
584  
585 Nelson XJ, 2014 Animal behavior can inform conservation policy, we just need to get on with the job – or can  
586 it? *Curr. Zool.* **60**, 479–485.  
587

- 588 Ness, JH, Bressmer, K, 2005. Abiotic influences on the behaviour of rodents, ants, and plants affect an ant-seed  
589 mutualism. *Ecoscience* **12**, 76–81.  
590
- 591 Newbold T, Scharlemann JPW, Butchart SHM, Sekercioglu CH, Alkemade R, Booth H, Purves DW. 2013.  
592 Ecological traits affect the response of tropical forest bird species to land-use intensity. *Proc R Soc B* **280**,  
593 20122131.  
594
- 595 Newbold, T. et al. 2015. Global effects of land use on local terrestrial biodiversity. *Nature* **520**, 45–50.  
596
- 597 Owens IPF, Bennett PM, 2000. Ecological basis of extinction risk in birds: Habitat loss versus human  
598 persecution and introduced predators. *Proc. Natl. Acad. Sci. USA* **97**, 12144–12148, doi:DOI  
599 10.1073/pnas.200223397  
600
- 601 Petchey OL, Gaston, KJ. 2002. Functional diversity (FD), species richness and community composition. *Ecol.*  
602 *Lett.* **5**, 402–411.  
603
- 604 Pigot A, Tobias JA, 2013. Species interactions constrain geographic range expansion over evolutionary  
605 time. *Ecol. Lett.* **63**, 330–338.  
606
- 607 Pigot A, Tobias JA. 2015. Dispersal and the transition to sympatry in vertebrates. *Proc. R. Soc. B* **282**, 20141929.  
608
- 609 Pigot A, Trisos CH, Tobias JA, 2016. Functional traits reveal the expansion and packing of ecological niche  
610 space underlying an elevational diversity gradient in passerine birds. *Proc. R. Soc. B* **283**, 20152013.  
611
- 612 Rodrigues ASL, Pilgrim JD, Lamoreux JF, Hoffmann M, Brooks TM 2006. The value of the IUCN Red List for  
613 conservation. *Trends Ecol. Evol.* **21**, 72–76.  
614
- 615 Santini L et al., 2019. Applying habitat and population density models to land cover time series to inform  
616 IUCN Red List assessments. *Conserv. Biol.* doi.org/10.1111/cobi.13279.  
617
- 618 F Sayol, J Maspons, O Lapiedra, AN Iwaniuk, T Székely, D Sol (2016) Environmental variation and the  
619 evolution of large brains in birds *Nature communications* **7**, 13971  
620
- 621 Scharlemann JPW, Balmford A, Green RE, 2005. The level of threat to restricted-range bird species can be  
622 predicted from mapped data on land use and human population. *Biol. Conserv.* **123**, 317–326.  
623
- 624 Sol D, Duncan RP, Blackburn TM, Cassey P, Lefebvre L. 2005 Big brains, enhanced cognition, and response of  
625 birds to novel environments. *Proc. Natl Acad. Sci. USA* **102**, 5460–5465. (doi:10.1073/pnas.0408145102)  
626
- 627 Sol D, Bacher S, Reader SM, Lefebvre L. 2008. Brain size predicts the success of mammal species introduced  
628 into novel environments. *Amer. Nat.* **172**, S63–S71.  
629

- 630 Sol D, Lapiedra O, Gonzalez-Lagos C. 2013. Behavioural adjustments for a life in the city. *Anim. Behav.*, **85**,  
631 1101–1112.
- 632
- 633 Sol D, Sayol F, Ducatez S, Lefebvre L. 2016. The life-history basis of behavioural innovations. *Phil. Trans. R.*  
634 *Soc. B* **371**, 20150187.
- 635
- 636 Stoddard MC, Yong EH, Akkaynak D, Sheard C, Tobias JA, Mahadevan L. 2017. Avian egg shape: form,  
637 function and evolution. *Science* **356**, 1249–1254.
- 638
- 639 Thaxter CB et al. (2017) Bird and bat species' global vulnerability to collision mortality at wind farms revealed  
640 through a trait-based assessment. *Proc. R. Soc. B* **284**, 20170829.
- 641
- 642 Tobias JA, Seddon N, 2002. Estimating population size in the Subdesert Mesite: new methods and implications  
643 for conservation. *Biol. Conserv.* **108**, 199–212.
- 644
- 645 Tobias JA, Brightsmith D, 2007. Distribution, ecology and conservation status of the Blue-headed Macaw  
646 *Primolius couloni*. *Biol. Conserv.* **139**, 126–138.
- 647
- 648 Tobias JA, Sheard C, Seddon N, Meade A, Cotton AJ, Nakagawa S, 2016. Territoriality, social bonds, and the  
649 evolution of communal signaling in birds. *Frontiers Ecol. Evol.* **4**, 74.
- 650
- 651 Tylianakis JM, Didham RK, Bascompte J, Wardle DA, 2008. Global change and species interactions in  
652 terrestrial ecosystems. *Ecol. Lett.* **11**: 1351–1363.
- 653
- 654 Ulrich W, Banks-Leite C, De Coster G, Habel JC, Matheve H, Newmark WD, Tobias, JA, Lens, L 2017.  
655 Environmentally and behaviourally mediated co-occurrence of functional traits in bird communities of  
656 tropical forest fragments. *Oikos* **127**, 274–284.
- 657
- 658 Villéger S, Mason NWH, Mouillot D. 2008. New multidimensional functional diversity indices for a  
659 multifaceted framework in functional ecology. *Ecology* **89**, 2290–2301.
- 660
- 661 Wilcove DS. 1985. Nest predation in forest tracts and the decline of migratory songbirds. *Ecology* **66**, 1211–  
662 1214.
- 663
- 664 Wilman H, Belmaker J, Simpson J, de la Rosa C, Rivadeneira MM, Jetz W, 2014. EltonTraits 1.0: Species-level  
665 foraging attributes of the world's birds and mammals. *Ecology* **95**, 2027.
- 666
- 667

668

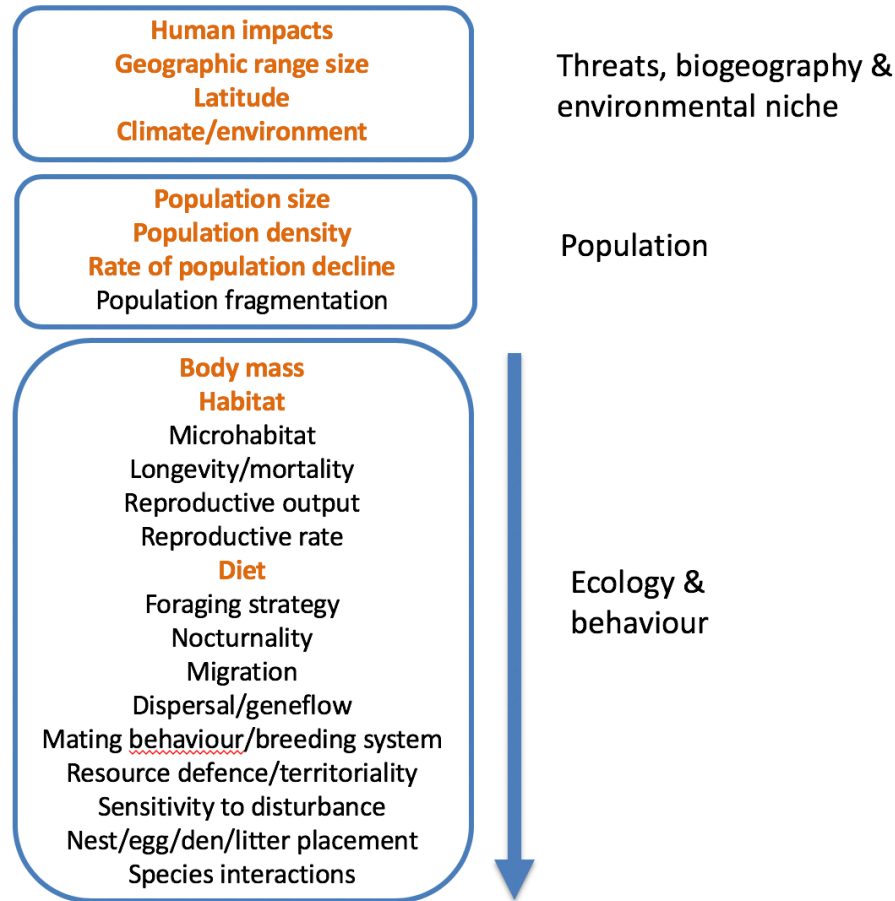

669

670

671

672 **Figure 1.** Extrinsic and intrinsic factors associated with extinction risk or conservation status at global scales.  
673 Extrinsic factors include anthropogenic threats to species and the biogeographic and environmental context;  
674 intrinsic factors include population and ecological niche dimensions. This diagram summarises the types of  
675 traits that are either available or desirable when constructing models of conservation risk at macroecological  
676 (continental or global) scales; numerous additional factors may impinge on conservation assessments in  
677 particular clades or species. Red text indicates datasets currently available for all species in well studied  
678 groups like birds. Availability of data is currently biased towards environmental, biogeographical and  
679 population attributes, whereas data tend to be unavailable, uncertain or sparse for most ecological variables,  
680 and absent for behavioural variables.

681

682

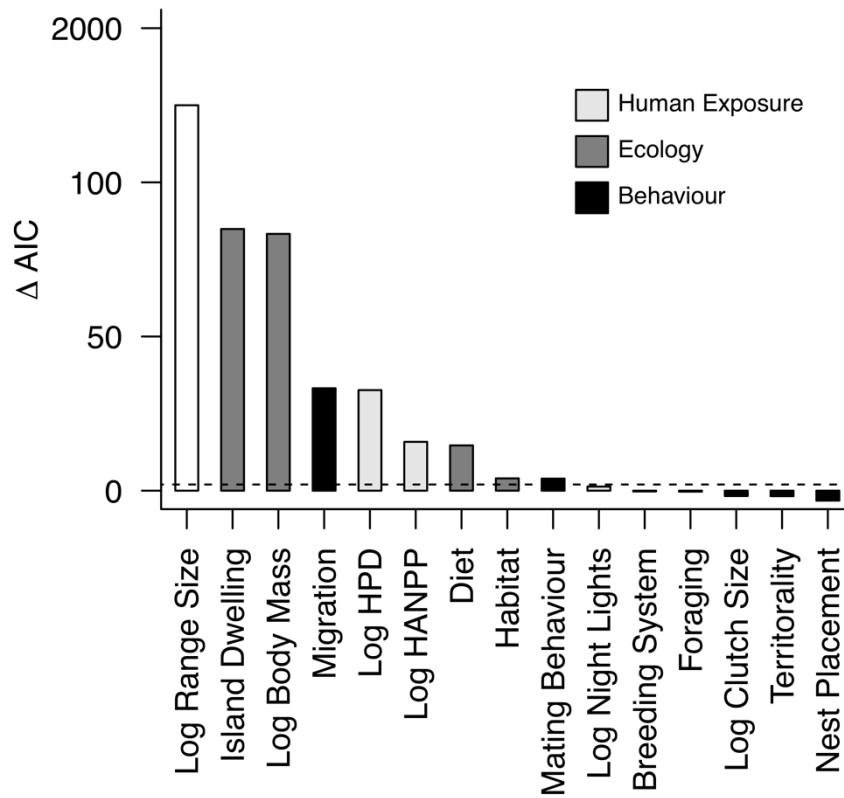

683

684

685

686 **Figure 2.** The relative contribution of anthropogenic, ecological and behavioural variables to explaining threat

687 status. Variable contributions are quantified as the difference in AIC between the full model and a model

688 excluding each variable. Variables are colored according to variable type. The dashed line indicates a

689 difference of 2 AIC units indicating strong support for variable inclusion.

690



691

692

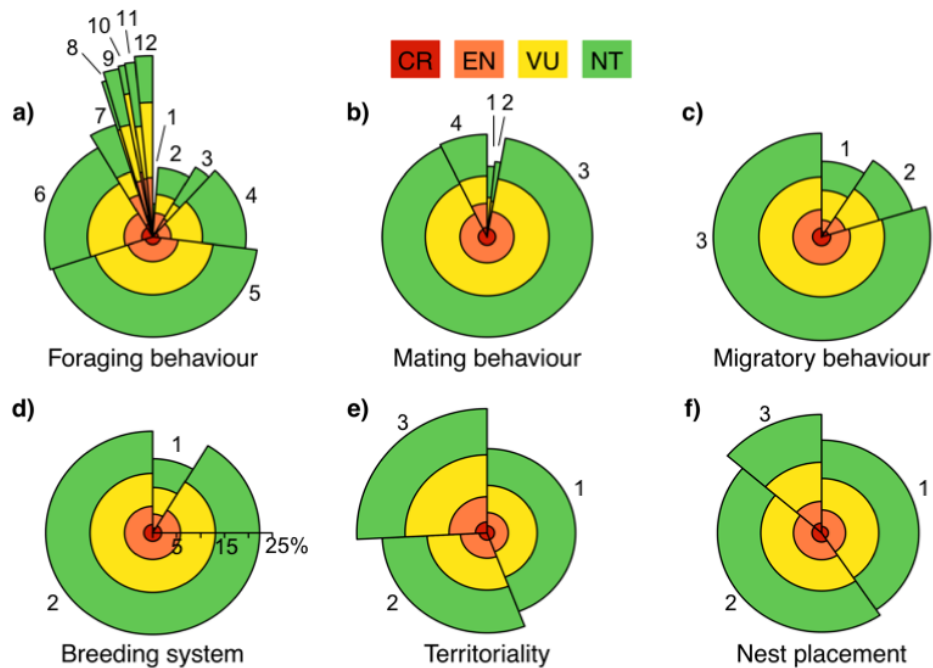

693

694

695

696

697 **Figure 3.** The % of threatened species in different behavioural syndromes: a) Foraging behaviour (1 Foraging  
 698 generalist, 2 Aerial screen, 3 Bark glean, 4 Aerial sally, 5 Arboreal glean, 6 Ground forage, 7 Aquatic ground, 8  
 699 Aquatic plunge, 9 Aquatic surface, 10 Aquatic aerial, 11 Aquatic generalist, 12 Aquatic dive), b) Mating  
 700 behaviour (1 Monogamy with infrequent polygyny, 2 Monogamy with frequent polygyny, 3 Monogamy, 4  
 701 Polygyny), c) Migratory behaviour (1 Migrant, 2 Partial migrant, 3 Sedentary), d) Breeding system (1  
 702 Cooperative, 2 Non-cooperative), e) Territoriality (1 Weak, 2 Strong, 3 None), f) Nest placement (1 Cavity, 2  
 703 Exposed elevated, 3 Exposed ground). The width of each segment indicates the proportion of all species (N =  
 704 9576) in each behavioural syndrome. Segment heights indicate the % of species that are threatened in each  
 705 syndrome. Colours indicate threat level (Critically endangered [CR], Endangered [EN], Vulnerable [VU] and  
 706 Near Threatened [NT]).

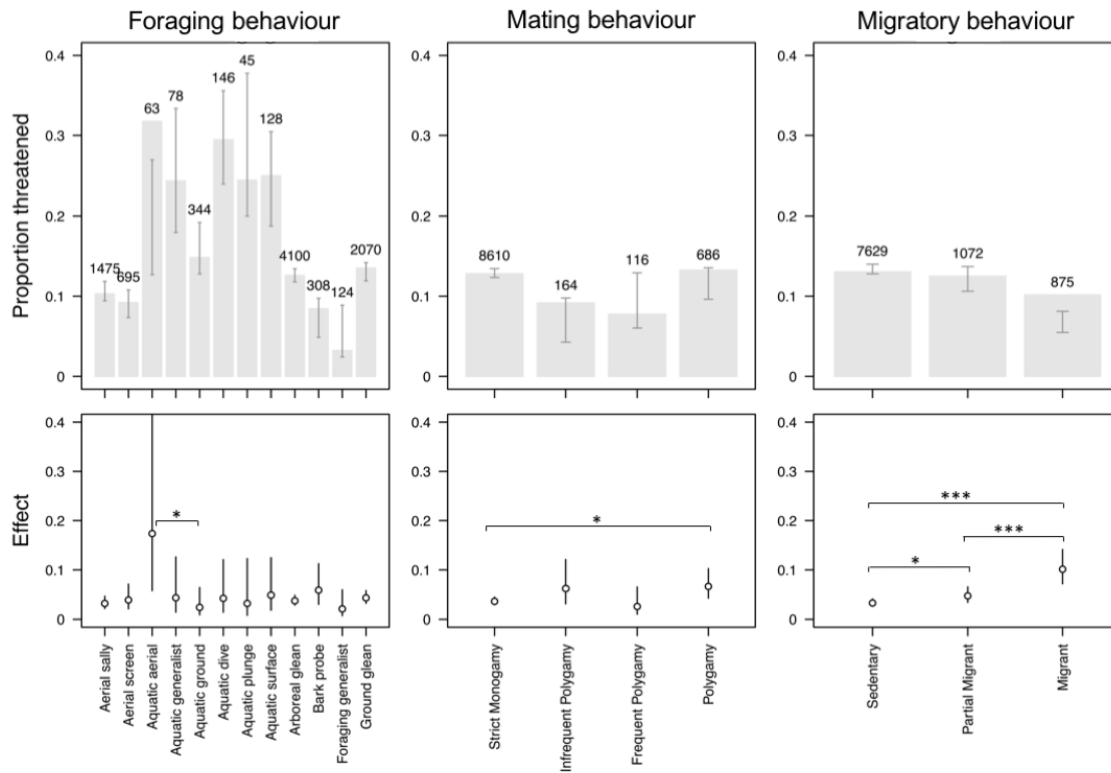

707

708

709

710

711

712

713

714

715

716

**Figure 4.** Variation in the prevalence of threat across behavioural syndromes. Top row: bars indicate the observed proportion of threatened species for different foraging modes, mating behavioural and migratory strategies. Brackets indicate the expected proportion (95% CI) of species threatened based on all other predictor variables. Numbers indicate the number of species in each category. Bottom row: the estimated effect size of each behavioral category (mean and 95% CI). Significant contrasts are indicated at the  $p = 0.05$  (\*),  $p = 0.01$  (\*\*) and  $p = 0.001$  (\*\*\*) level. Effect sizes and significance was assessed with a generalized linear mixed effects model including all predictor variables and family as a random effect.
